# Supplementary material for: De novo transcription of multiple Hox cluster genes takes place simultaneously in early Xenopus tropicalis embryos
Source: PubMed Central journal article supplement (PMC6451350; doi:10.1242/bio.038422), 2019-01-16
Supplement: biolopen-8-038422-s1.pdf [file biolopen-8-038422-s1.pdf]

Fig. S1 (Kondo et al.)

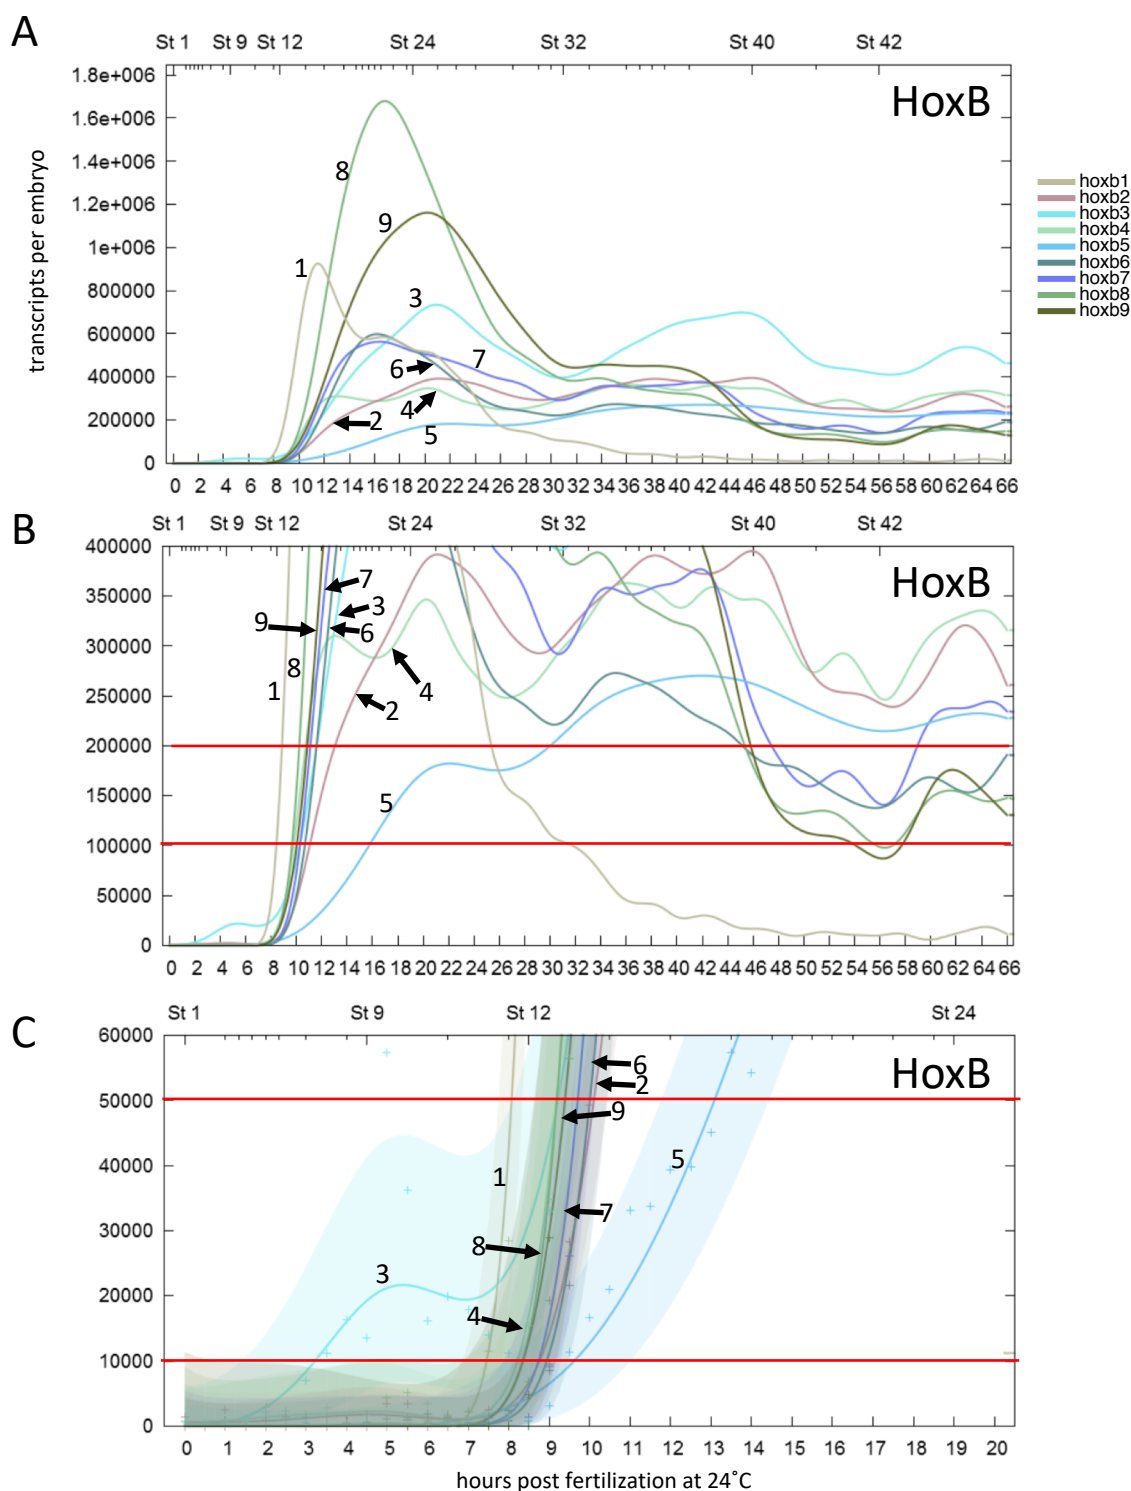

**Fig. S1. Expression profiles of *hoxb*, *hoxc*, and *hoxd* genes by RNA-seq.**

Expression profiles of all *hoxb* (A-C), *hoxc* (D-F), and *hoxd* (G-I) genes were retrieved from the expression profile database (<http://genomics.crick.ac.uk/apps/profiles/>). PG numbers are indicated. Red lines are drawn at 200,000, 100,000, 50,000, and 10,000 transcripts per embryo (the same as shown in Table 1). The colored regions mark Gaussian process 95% confidence intervals for each gene in C, F and I, and their overlaps show that genes reached certain numbers of transcripts simultaneously, or the precise order cannot be determined.

Fig. S1 (continued) (Kondo et al.)

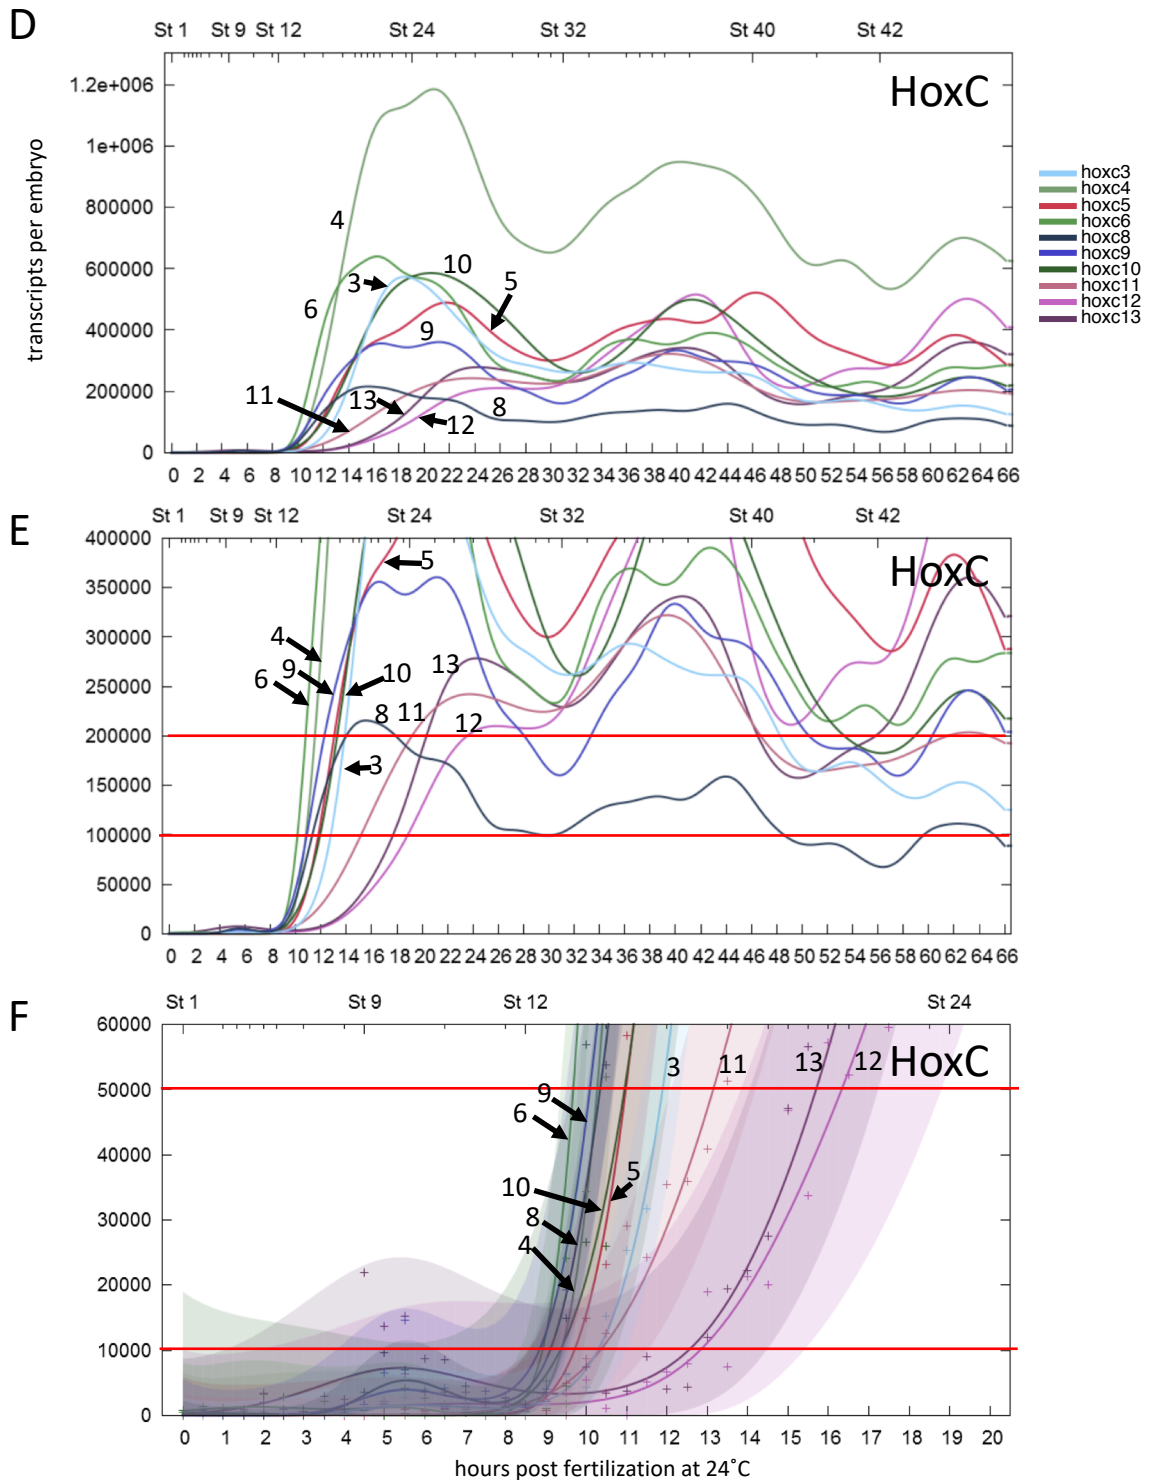

Fig. S1 (continued) (Kondo et al.)

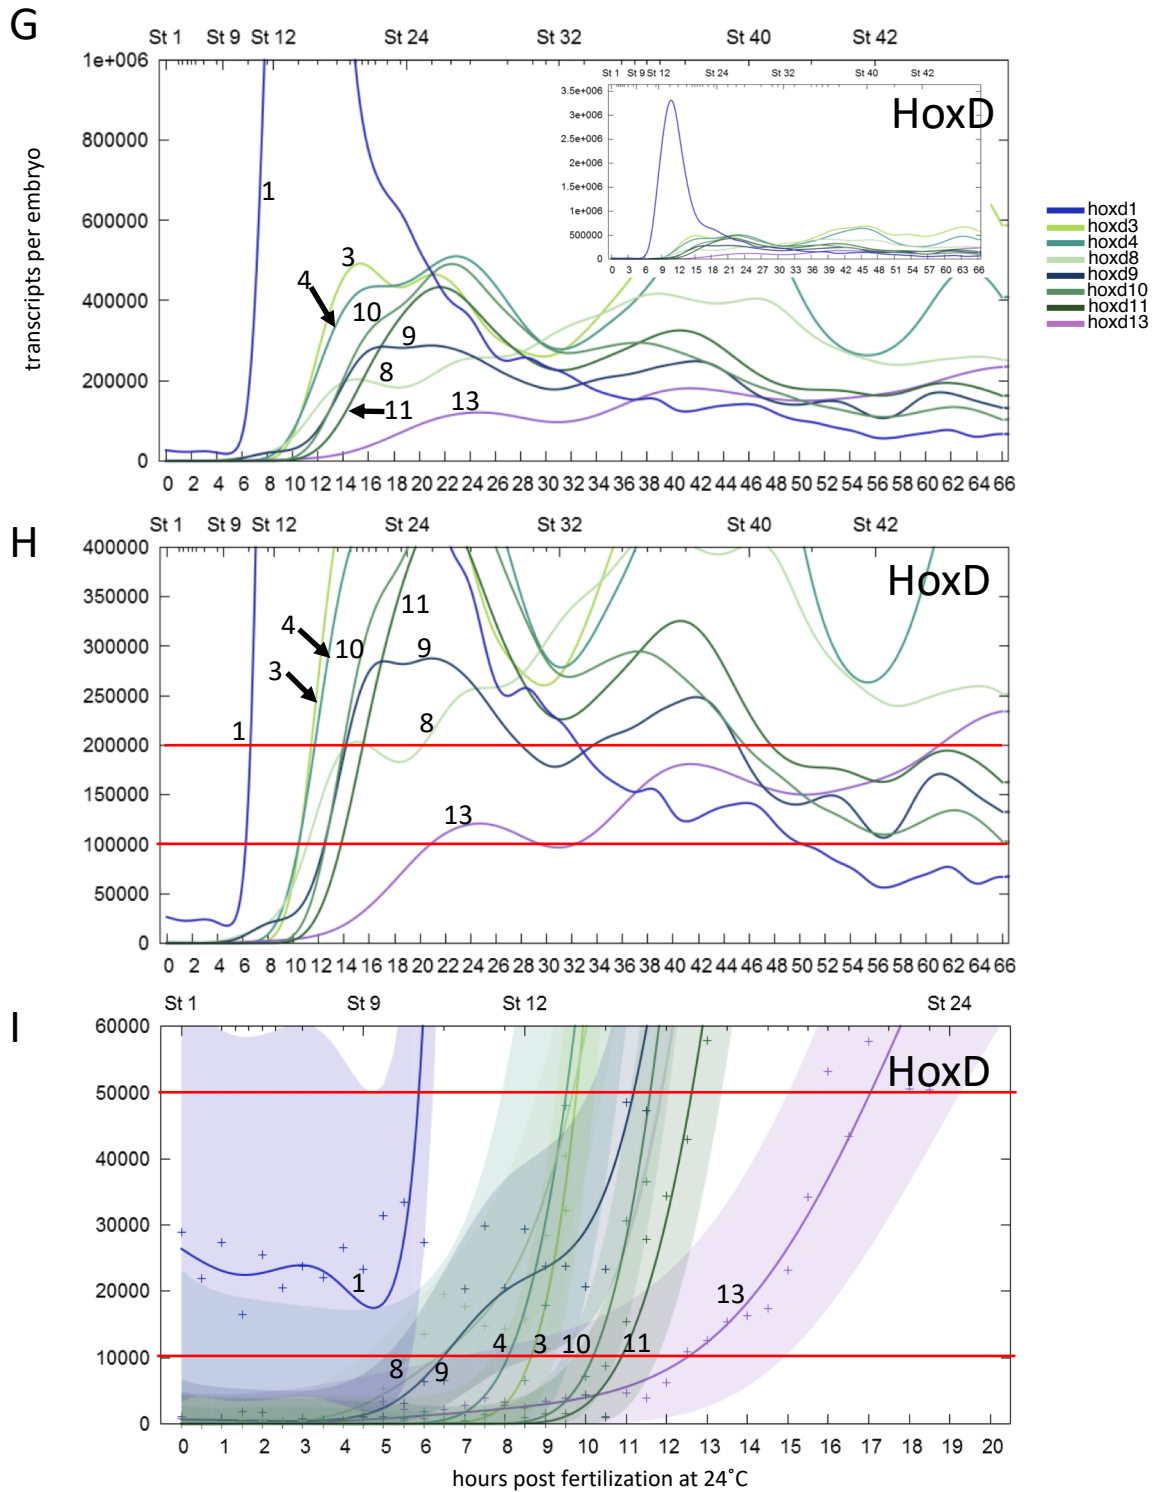

Fig. S2 (Kondo et al.)

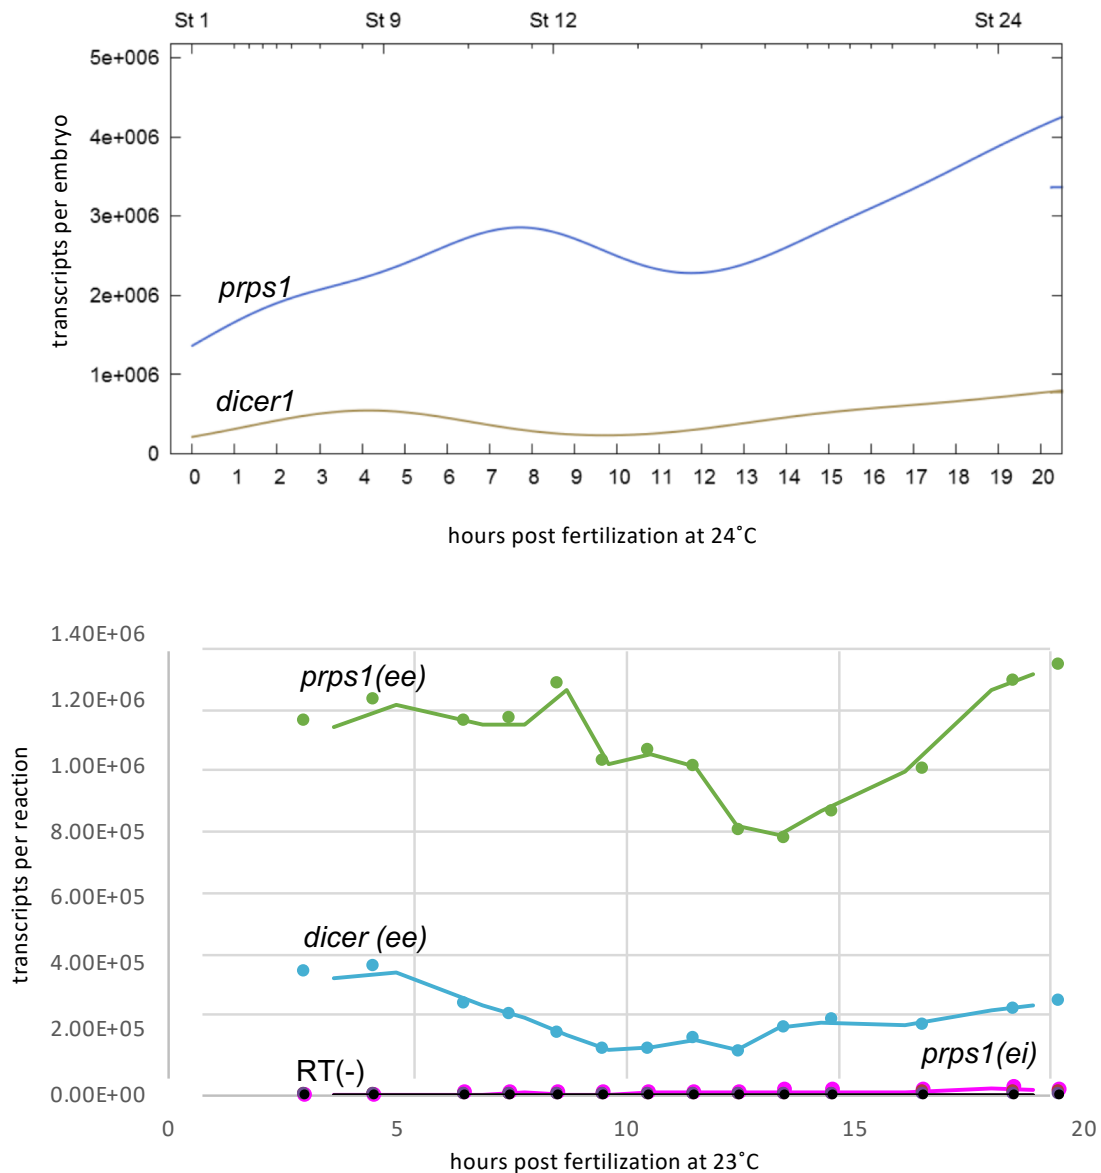

**Fig. S2. Expression profiles of two housekeeping genes, *prps1* and *dicer1*.**

Expression profiles of two housekeeping genes, *prps1* and *dicer1*, by RNA-seq (A) (Owens et al., 2016) and by qPCR (B) are shown. ee, mature RNA. ei, precursor RNA. The RNA-seq data was retrieved from <http://genomics.crick.ac.uk/apps/profiles/>. qPCR for all primer sets were performed with RT- samples (represented in black) to detect traces of contaminated genomic DNA. The copy numbers of pre-spliced *prps1* (ei) (magenta) were also low, but reached to about 20000 transcripts per reaction at 18.5 hpf. The amount of total RNA extracted per embryo was not different among stages, and the same amount of RNA was used per qPCR reaction. Therefore, the expression profiles of *prps1* and *dicer1* from RNA-seq and qPCR (ee) are directly comparable.

Fig. S3 (Kondo et al.)

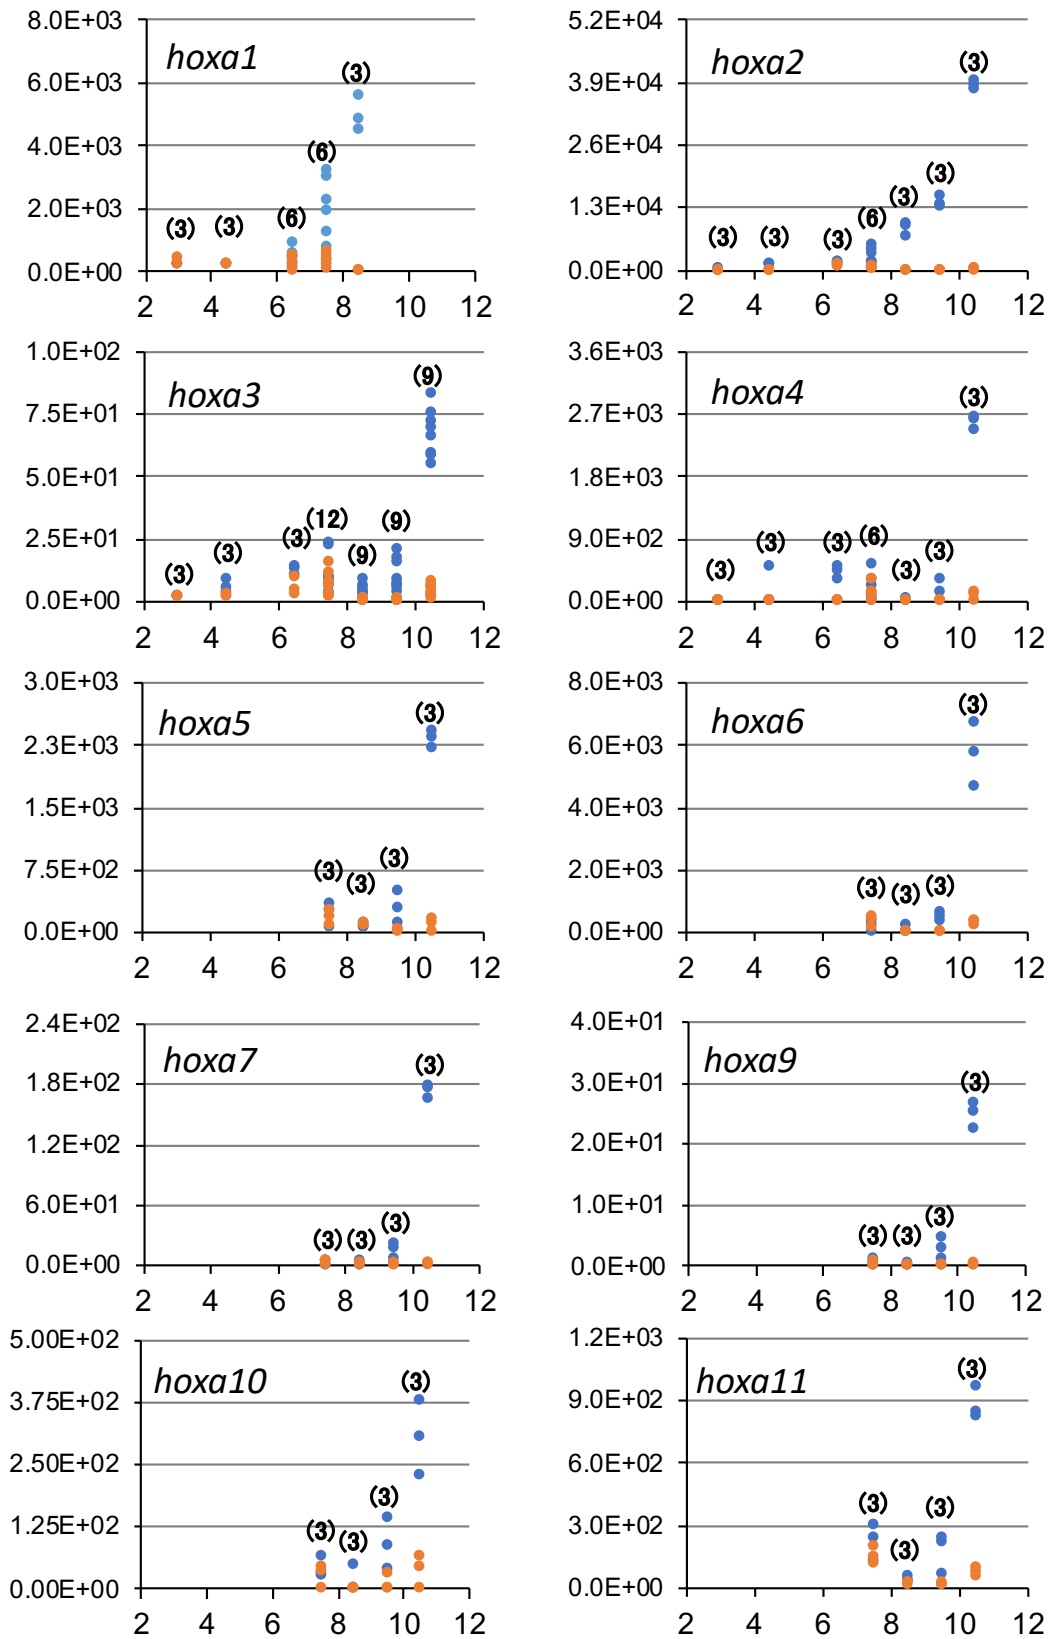

Fig. S3. Individual qPCR expression data of *hox* genes presented in Fig. 3.

The same data shown in Fig. 3 are replotted, in which each individual copy number per reaction is plotted as a dot for RT+ (blue) or RT- (orange) with the same number of replicates. The numbers in parentheses are sample sizes, between 3 and 12 replicates. Since the layer of blue dots is behind that of orange dots, some blue dots are hidden by orange dots. The x-axis represents hpf.

Fig. S3 (continued) (Kondo et al.)

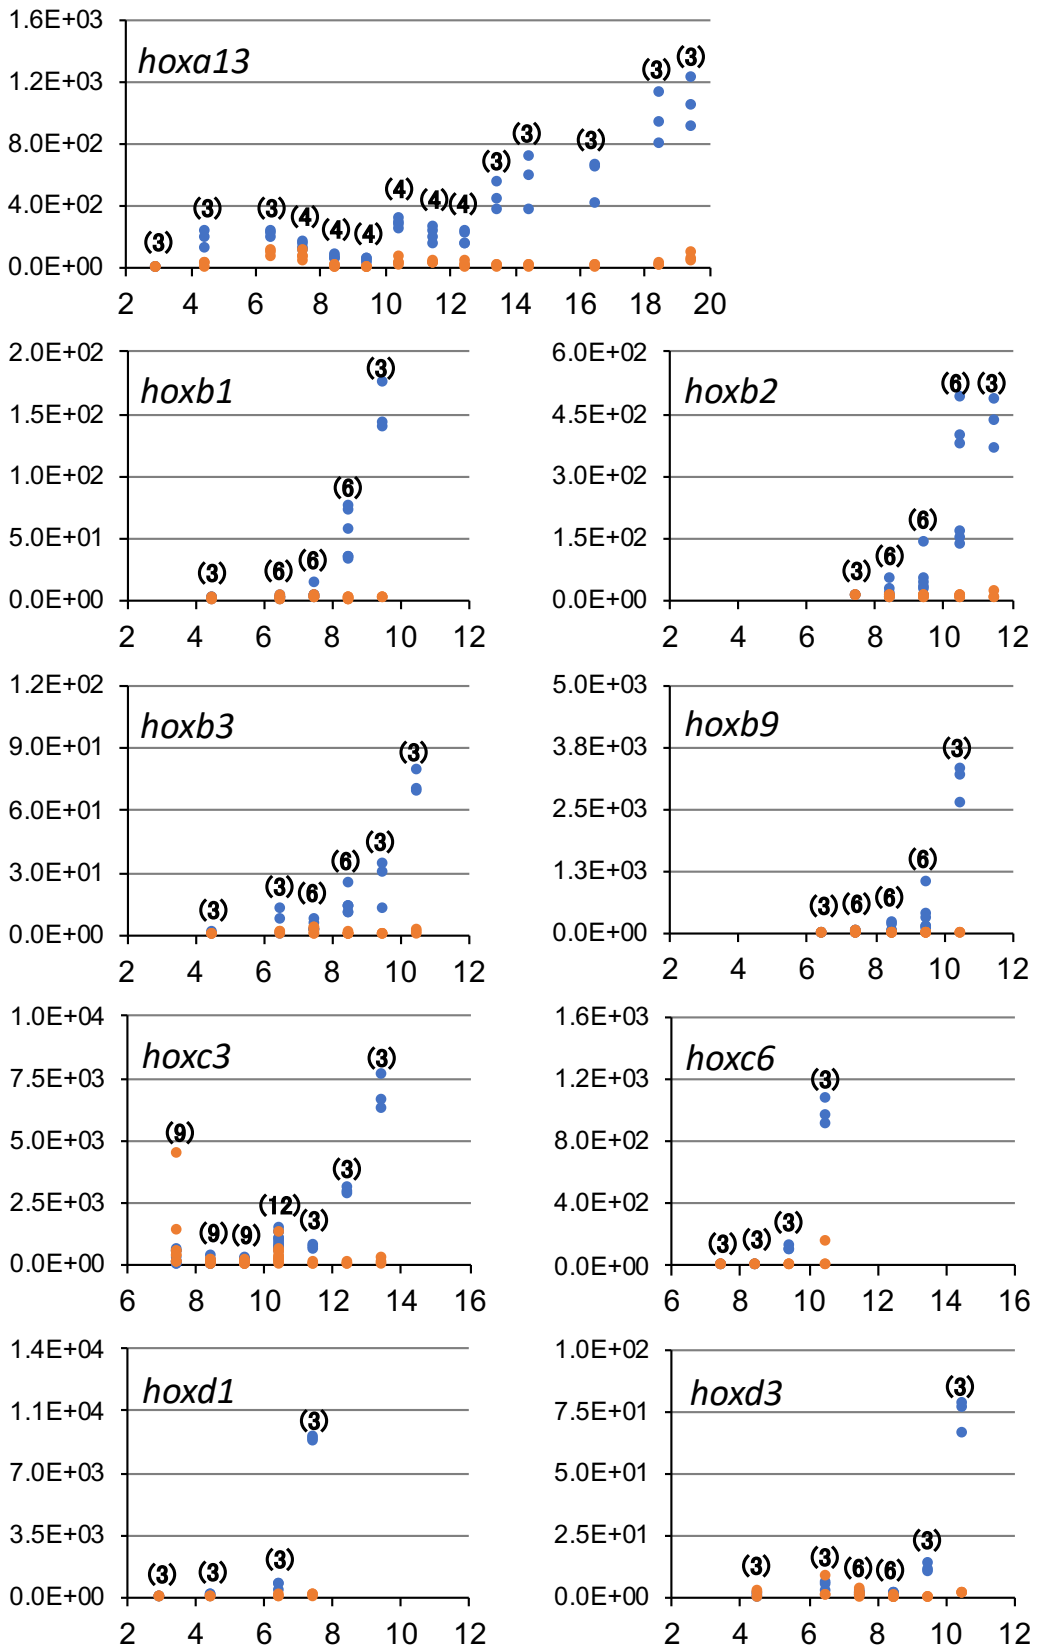

**Fig. S4. The extrapolated onset method estimating *hox* gene activation.**

Using the same data sets of qPCR as Fig. 3 or Fig. S3, the numbers of de novo synthesized transcripts were calculated. The data was analyzed using the Tukey-Kramer test and compared. Significant differences among data points are indicated in lowercase alphabets (for example, "b" represents significantly different from "a", while no significant difference was detected between the same alphabets). Two consecutive data points which show significant differences were connected and the intercept to the x-axis (time) was calculated as the onset of active transcription, except for *hoxc3*, where three points (10, 11.5, and 12.5 hpf) were used for the calculation (see Experimental Procedures).

Fig. S4 (Kondo et al.)

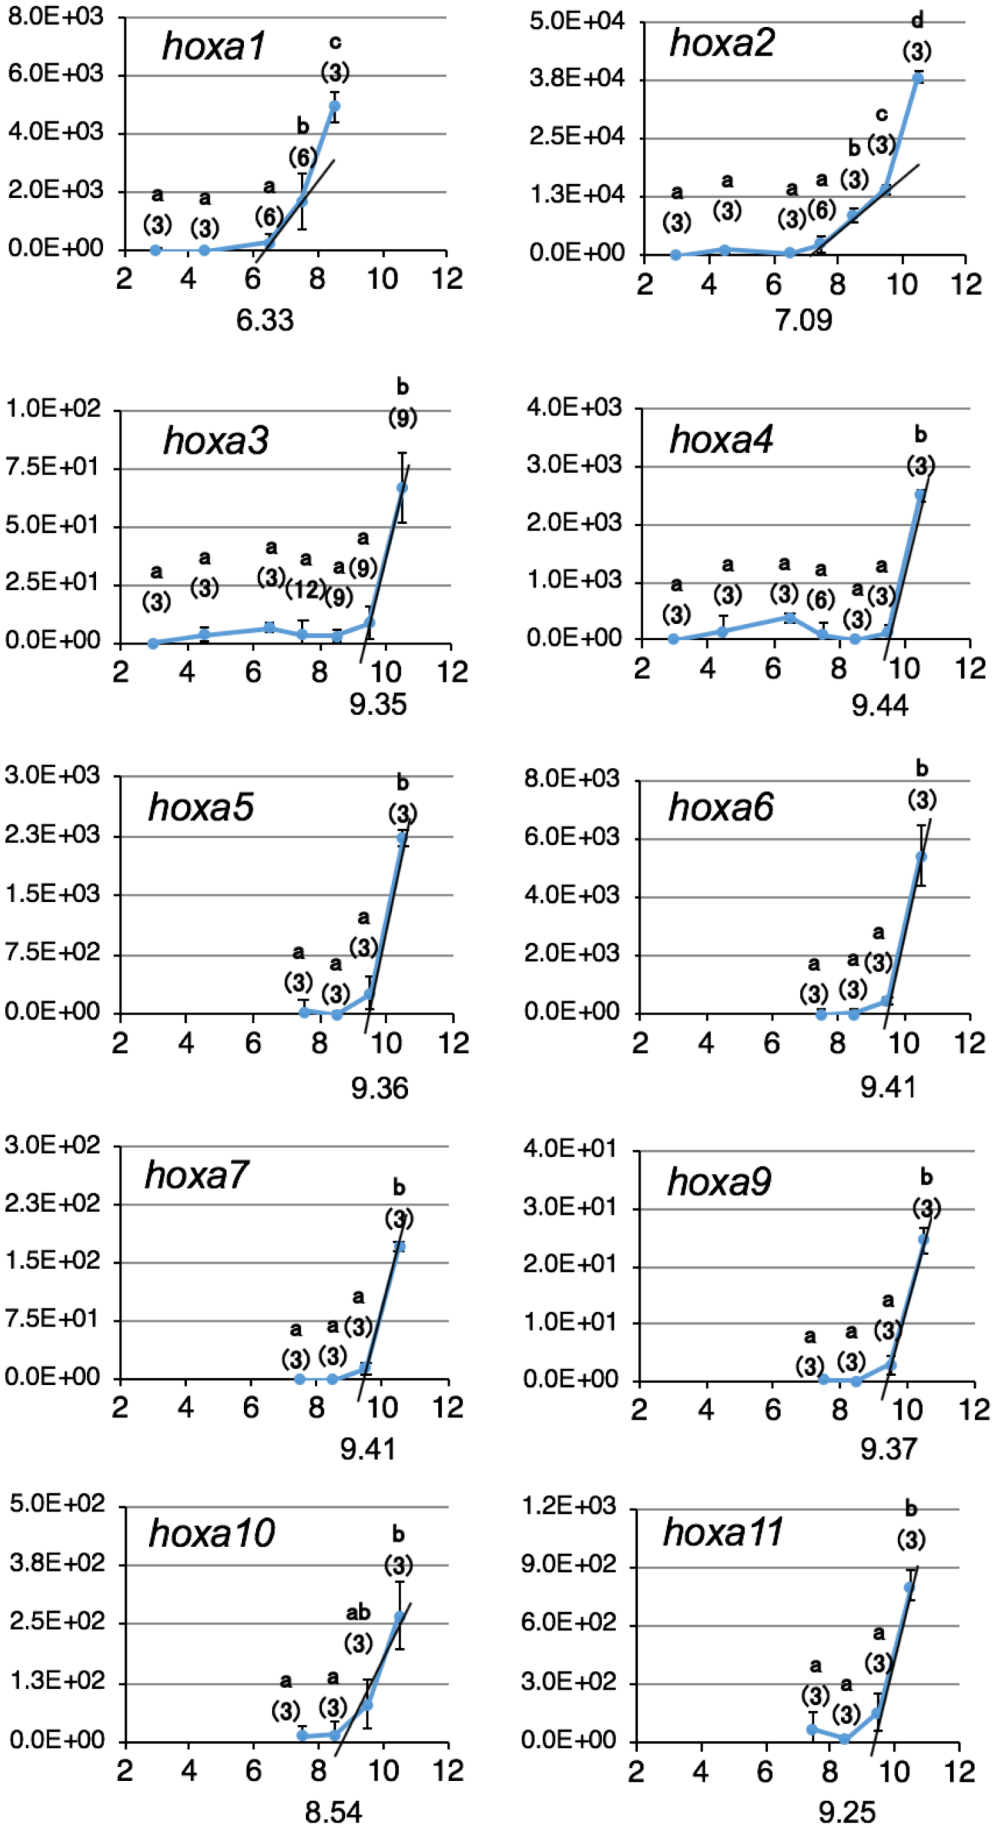



Fig. S4 (continued) (Kondo et al.)

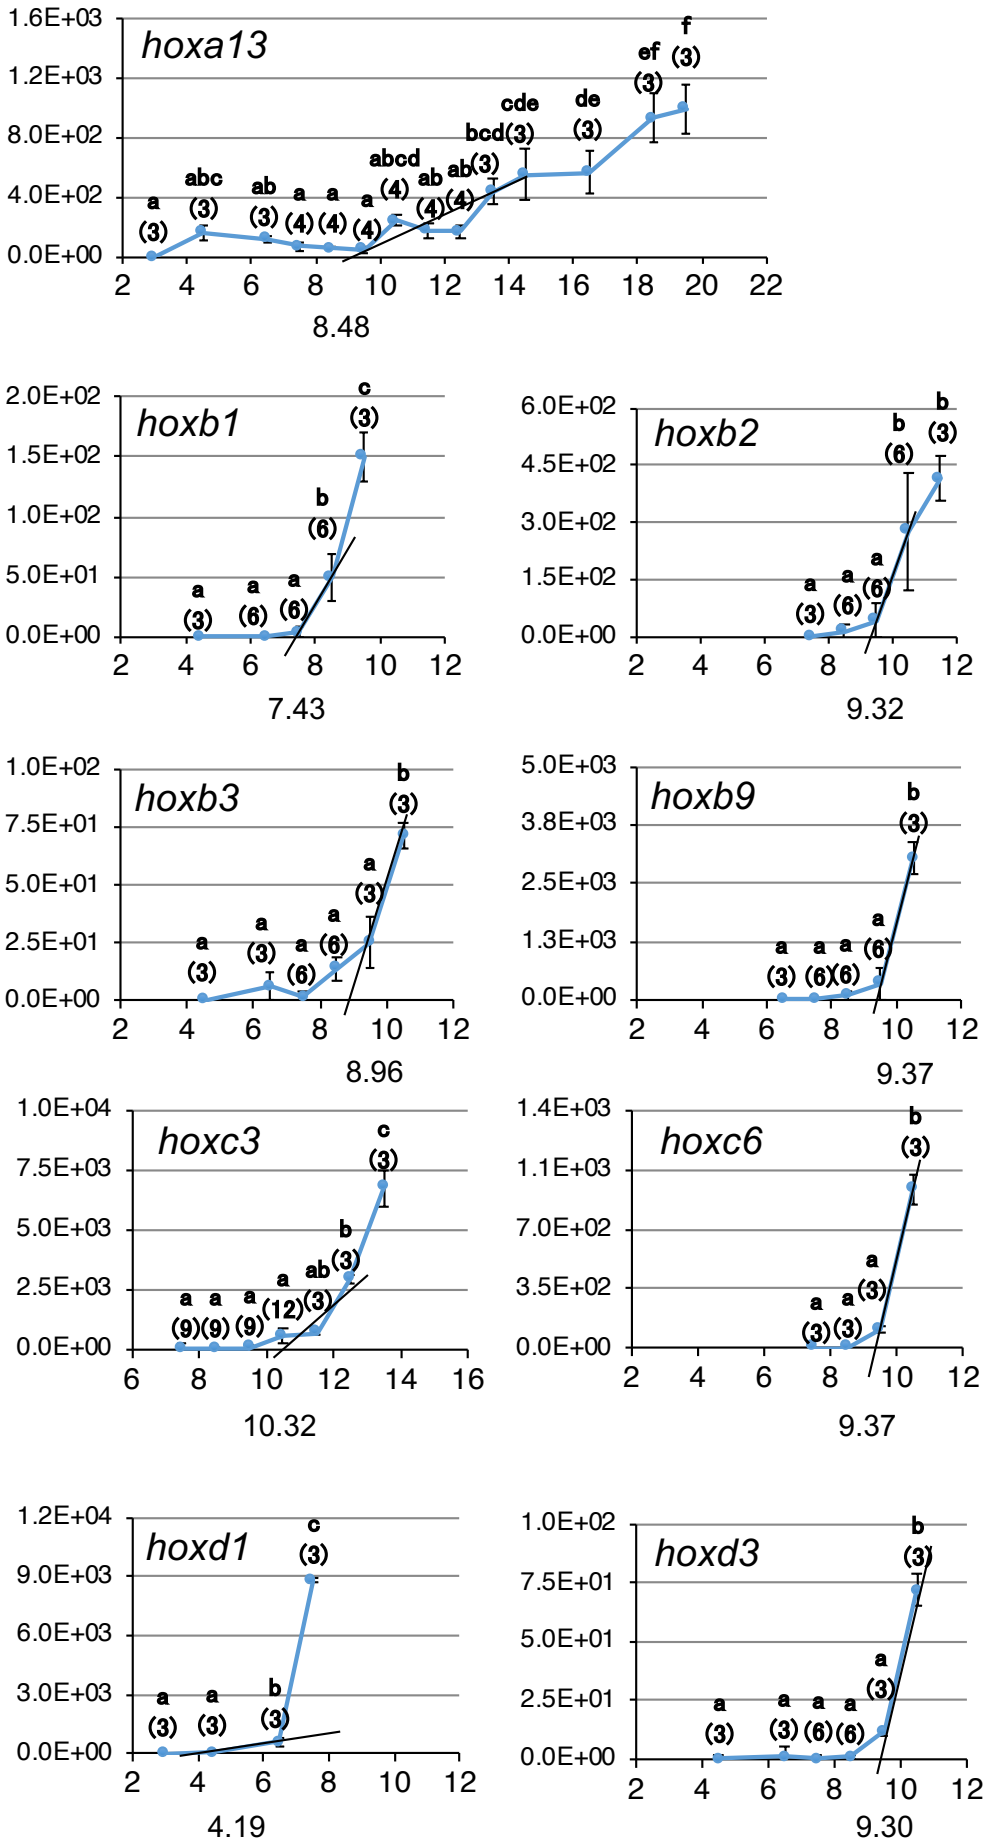

Fig. S5 (Kondo et al.)

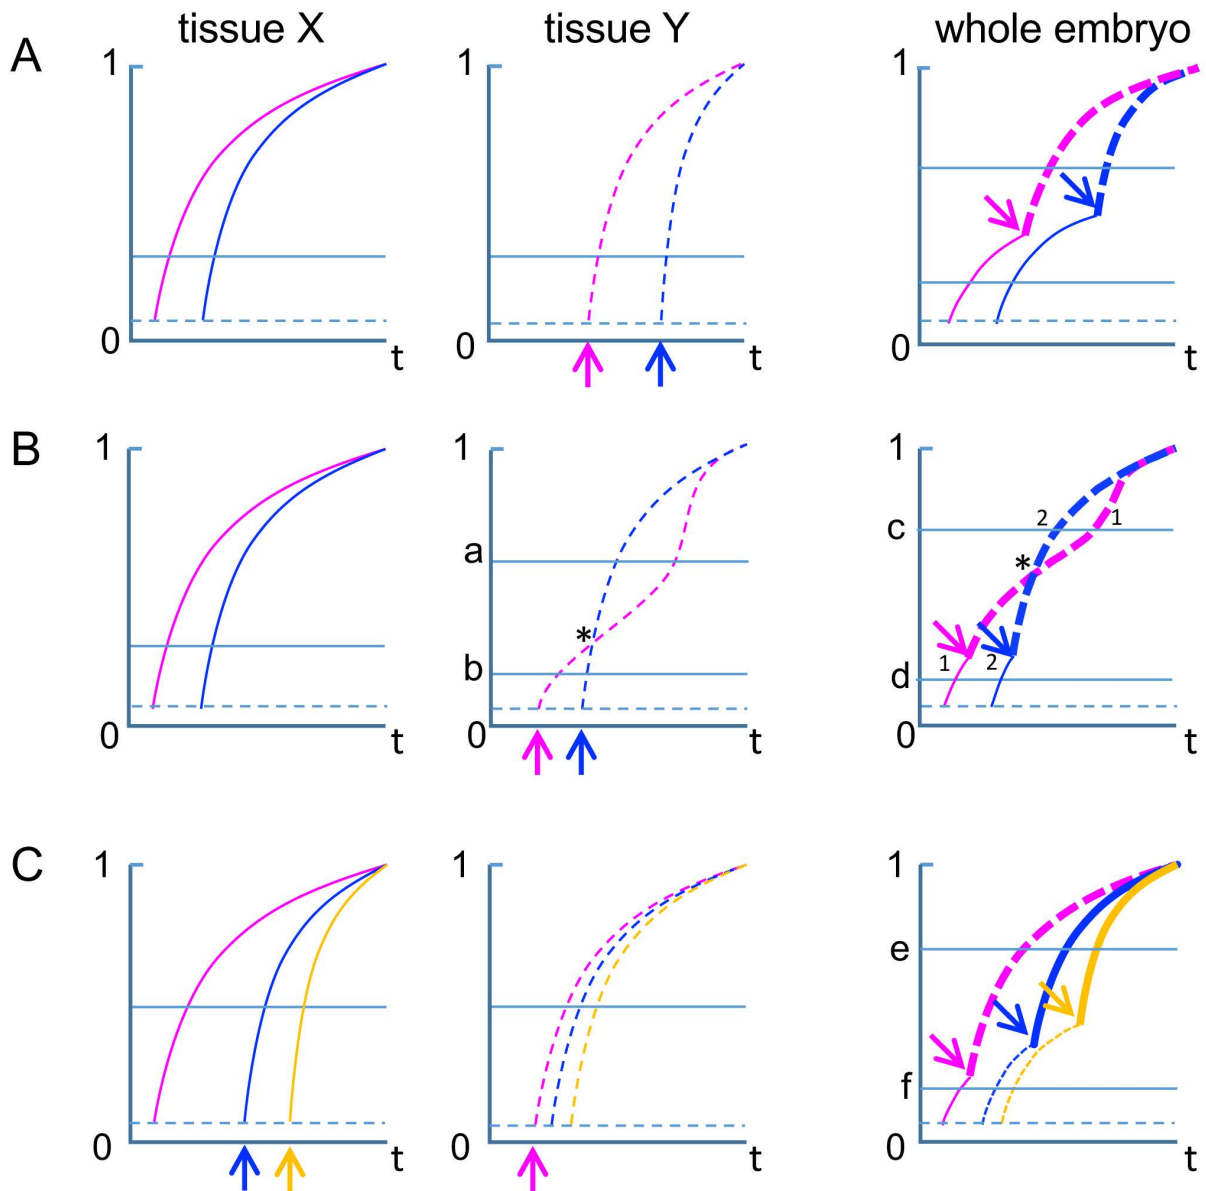

**Fig. S5. Simulation of hypothetical genes expressed in the order of temporal collinearity.**

Simulation of the time course of de novo expression of two or three *hox* genes 1 (magenta), 2 (blue), and 3 (yellow) in two tissues (X and Y, left and middle panels) and in the whole embryo (the sum of tissues X and Y, right panels) are depicted, assuming genes start expression in the order according to the temporal collinearity hypothesis, from gene 1 to 3 (anterior to posterior), and expression starts in tissue X earlier than tissue Y. x-axis, time (t); y-axis, the number of transcripts (normalized by the highest value as 1); vertical arrows in left and middle panels, the late expression in tissue X or Y compared to the other; oblique arrows in the right-most panel, the start point of cumulative expression (thick lines); solid horizontal lines, a detectable number of transcripts; dashed horizontal lines, detection limits; asterisks, the crossing point of transcript number between genes. (A) Simple monotonous increment of de novo transcripts in all genes. The anterior gene 1 always reaches a detectable number (horizontal lines) earlier than the posterior gene 2. (B) Non-monotonous increment of de novo transcripts in tissue Y. In tissue Y, the order to reach a higher number (a) is reversed after the crossing point (asterisks) than a low number (b). This is the same in a whole embryo (c vs d). (C) Different timing of initial transcription of three genes in tissues X and Y. The three genes in tissue Y start to be transcribed between the start of expression of gene 1 and 2 in tissue X. In the whole embryo, the order that gene transcripts reach a high number (e) or a lower number (f) are the same, matching the order of genes.

Table S1: List of primers used in the study

| gene          | primer name | sequence                  | position             | annealing temperature |
|---------------|-------------|---------------------------|----------------------|-----------------------|
| <i>dicer</i>  | Xtdicer1-f  | TGCTGAGAAAACCCTTGACCA     | exon                 | 55                    |
|               | Xtdicer1-r  | TGGTAAGAGGCATGTGTAAAAGC   | exon                 |                       |
| <i>prps1</i>  | Xtprps1-f1  | TGACATGGCAGATACGTGTG      | exon                 | 60                    |
|               | Xtprps1-r1  | CAGGGCCCGAGAATATAACC      | exon                 | 60 (with f1)          |
|               | Xtprps1-r2i | AATCTGGGCACCAGCATTAC      | intron               |                       |
| <i>hoxa1</i>  | Xthoxa1-f1  | TCTCCTTCCAGCGAAACATC      | exon                 | 60                    |
|               | Xthoxa1-r1  | ACAAGGGCGCCTTAATAGAG      | intron               |                       |
| <i>hoxa2</i>  | Xthoxa2-f1  | ACGGCACAATGGAGTTTACTG     | intron               | 60                    |
|               | Xthoxa2-r1  | CCGGGAGAAGGCAGAACTAAG     | intron               |                       |
| <i>hoxa3</i>  | Xthoxa3-f1  | CGATGGCGCTACATGTGTA       | intron               | 60                    |
|               | Xthoxa3-r1  | TTGGAACCTGGGCTTCTTGG      | intron               |                       |
| <i>hoxa4</i>  | Xthoxa4-f1  | GCCAGAGGATTTATTGGAGTCC    | intron               | 60                    |
|               | Xthoxa4-r1  | AAGGCTTCAGAGGAGCATGG      | intron               |                       |
| <i>hoxa5</i>  | Xthoxa5-f1  | ATTGGGTCCGGTCAGATGAGG     | intron               | 60                    |
|               | Xthoxa5-r1  | CTACACTGGGCTCTCACTGG      | intron               |                       |
| <i>hoxa6</i>  | Xthoxa6-f1  | CCCTGTCTATCCCTGGATGC      | exon                 | 60                    |
|               | Xthoxa6-r1  | GGTCCCTGTTCCACTTTGTC      | intron               |                       |
| <i>hoxa7</i>  | Xthoxa7-f1  | ACATCAACAAAGGGGTGAGCT     | intron               | 55                    |
|               | Xthoxa7-r1  | GGTCATAAGCATTCCCTTCCCT    | intron               |                       |
| <i>hoxa9</i>  | Xthoxa9-f1  | GCTCAATGGCAGGGAGAGAA      | intron               | 55                    |
|               | Xthoxa9-r1  | GTTCCCTTTGCGACTGAAGC      | intron               |                       |
| <i>hoxa10</i> | Xthoxa10-f1 | AACTTCACACCACATGCCTG      | intron               | 60                    |
|               | Xthoxa10-r1 | GGCTATGAGTGCACCCTTTG      | intron               |                       |
| <i>hoxa11</i> | Xthoxa11-f1 | AGACAAAGAAGCCCTGCGTG      | intron               | 60                    |
|               | Xthoxa11-r1 | CTGCTGTAAAACGTGTCCCC      | intron               |                       |
| <i>hoxa13</i> | Xthoxa13-f2 | GATTGCGGCTGAAGTTGGAG      | intron               | 60                    |
|               | Xthoxa13-r3 | GCACGACATCTGCAAAGGAC      | exon/intron junction |                       |
| <i>hoxb1</i>  | Xthoxb1-f1  | GCCTCCGCTTCACTTATATCC     | intron               | 60                    |
|               | Xthoxb1-r1  | TTTATTGCAGGGGTGGGAGC      | intron               |                       |
| <i>hoxb2</i>  | Xthoxb2-f1  | CTGGGCCATAACAGTGACGA      | intron               | 60                    |
|               | Xthoxb2-r1  | CCATGTGGCCAGTGGATTC       | intron               |                       |
| <i>hoxb3</i>  | Xthoxb3-f1  | TGTATAGTCCAGTCGCTGTAGG    | intron               | 60                    |
|               | Xthoxb3-r1  | TCAAGCGATGCAGACAGTTG      | intron               |                       |
| <i>hoxb9</i>  | Xthoxb9-f1  | CCACTAAACTGGGCACGGAT      | intron               | 55                    |
|               | Xthoxb9-r1  | CACAGCGTTTTGTCAGCCTG      | intron               |                       |
| <i>hoxc3</i>  | Xthoxc3-f2  | CCTTGGATGAAGGAAACTCG      | exon                 | 60                    |
|               | Xthoxc3-r2  | TCCCCATCAACAGGTAAAGC      | intron               |                       |
| <i>hoxc6</i>  | Xthoxc6-f1  | TTCATGGTTGCACGGGTTTG      | intron               | 55                    |
|               | Xthoxc6-r1  | CCCTGCCCAGAAACGACTTT      | intron               |                       |
| <i>hoxd1</i>  | Xthoxd1-f2  | CAGTAGCCAGAATATCCATGCG    | intron               | 60                    |
|               | Xthoxd1-r2b | TGCTACCCCATATTCAGATTGTAAC | exon                 |                       |
| <i>hoxd3</i>  | Xthoxd3-f2  | GAACAGAGAGGGTGAGTGGG      | intron               | 60                    |
|               | Xthoxd3-r2  | AGCCATTGAGCCATTGAGCC      | intron               |                       |
